# Supplementary material for: Environmental Characteristics Associated with the Presence of the Pelagic Stingray (Pteroplatytrygon violacea) in the Pacific High Sea
Source: MDPI journal article supplement (doi:10.3390/fishes8010046), 2023-01-10
Supplement: s1 [file s1]

Supplementary Materials

# Environmental Characteristics Associated with the Presence of the Pelagic Stingray (*Pteroplatytrygon violacea*) in the Pacific High Sea

Jiaqi Wang <sup>1</sup>, Chunxia Gao <sup>1,2,3</sup>, Feng Wu <sup>1,2,3</sup>, Libin Dai <sup>1</sup>, Qiuyun Ma <sup>1,2,3</sup> and Siquan Tian <sup>1,2,3,\*</sup>

<sup>1</sup> College of Marine Sciences, Shanghai Ocean University, Shanghai 201306, China

<sup>2</sup> National Engineering Research Center for Oceanic Fisheries, Shanghai Ocean University, Shanghai 201306, China

<sup>3</sup> Key Laboratory of Sustainable Exploitation of Oceanic Fisheries Resources, Ministry of Education, Shanghai Ocean University, Shanghai 201306, China

\* Correspondence: sqtian@shou.edu.cn

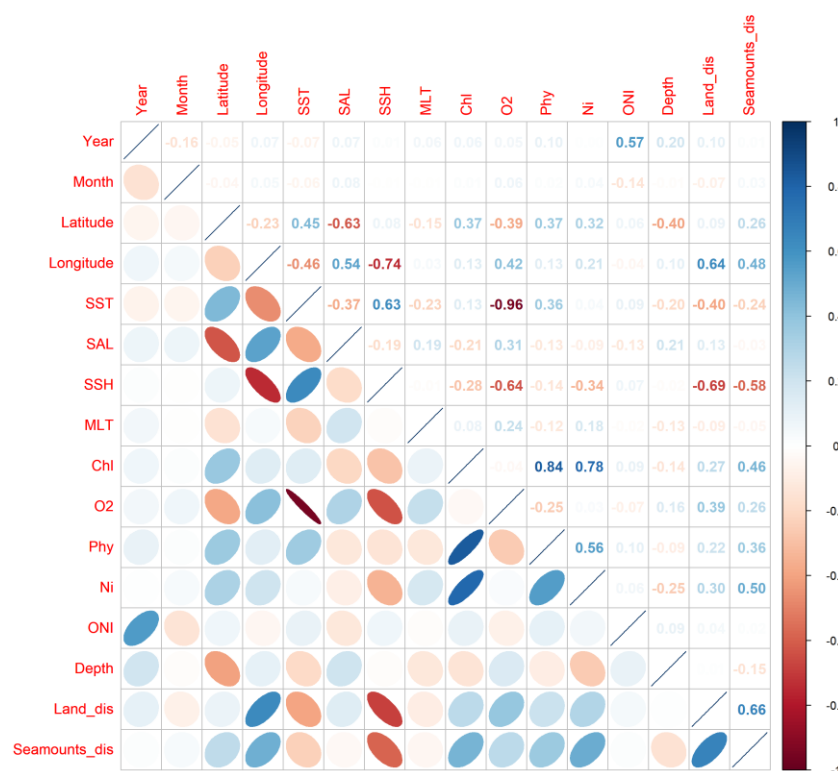

Figure S1. Pearson correlation coefficient between variables.

**Table S1.** Collinearity between variables by calculating Variance Inflation Factor (VIF).

| Variables     | VIF    | VIF with selected variables |
|---------------|--------|-----------------------------|
| Year          | 1.702  | 1.607                       |
| Month         | 1.084  | 1.067                       |
| Latitude      | 2.543  | 2.531                       |
| Longitude     | 4.505  | 2.824                       |
| SST           | 20.241 | 1.941                       |
| SAL           | 3.031  | 2.484                       |
| SSH           | 5.451  | -                           |
| MLT           | 1.404  | 1.257                       |
| Chl           | 8.708  | 1.536                       |
| O2            | 15.198 | -                           |
| Phy           | 6.511  | -                           |
| Ni            | 3.519  | -                           |
| ONI           | 1.596  | 1.567                       |
| Depth         | 1.384  | 1.332                       |
| Land_dis      | 2.773  | 2.687                       |
| Seamounts_dis | 2.456  | 2.397                       |

**Table S2.** Model selected by stepwise analysis.

| Variables included in the model                                                                                    | AIC      |
|--------------------------------------------------------------------------------------------------------------------|----------|
| ~s(Longitude, Latitude)                                                                                            | 12504.19 |
| ~s(Longitude, Latitude)+s(Month)                                                                                   | 12365.37 |
| ~s(Longitude, Latitude)+s(Month)+s(SAL)                                                                            | 12249.87 |
| ~s(Longitude, Latitude)+s(Month)+s(SAL)+s(Nino)                                                                    | 12132.00 |
| ~s(Longitude, Latitude)+s(Month)+s(SAL)+s(Nino)+s(Chl)                                                             | 12052.35 |
| ~s(Longitude, Latitude)+s(Month)+s(SAL)+s(Nino)+s(Chl)+s(SST)                                                      | 12010.95 |
| ~s(Longitude, Latitude)+s(Month)+s(SAL)+s(Nino)+s(Chl)+s(SST)+s(Year)                                              | 11986.89 |
| ~s(Longitude, Latitude)+s(Month)+s(SAL)+s(Nino)+s(Chl)+s(SST)+s(Year)+s(MLT)                                       | 11963.47 |
| ~s(Longitude, Latitude)+s(Month)+s(SAL)+s(Nino)+s(Chl)+s(SST)+s(Year)+s(MLT)+s(Land_dis)                           | 11934.59 |
| ~s(Longitude, Latitude)+s(Month)+s(SAL)+s(Nino)+s(Chl)+s(SST)+s(Year)+s(MLT)+s(Land_dis)+s(Seamounts_dis)          | 11916.50 |
| ~s(Longitude, Latitude)+s(Month)+s(SAL)+s(Nino)+s(Chl)+s(SST)+s(Year)+s(MLT)+s(Land_dis)+s(Seamounts_dis)+s(Depth) | 11909.50 |
